# Supplementary material for: Mycobiome of the Bat White Nose Syndrome Affected Caves and Mines Reveals Diversity of Fungi and Local Adaptation by the Fungal Pathogen Pseudogymnoascus (Geomyces) destructans
Source: PLoS One. 2014 Sep 29;9(9):e108714. doi: 10.1371/journal.pone.0108714 (PMC4181696; doi:10.1371/journal.pone.0108714)
Supplement: Table S7 — Details of ITS sequences of fungal clones recovered by CI method. (DOCX) [file pone.0108714.s008.docx]

Table S7. Details of ITS sequences of fungal clones recovered by CI method

| Sum  (%)a | OTUb | | Accession no. | Best BLAST hit  Taxon Phylum Scorec Acc. no.d Coverage e | | | | | | %Similiarityf |
| --- | --- | --- | --- | --- | --- | --- | --- | --- | --- | --- |
| 0.41 | | S01-02 JX898552 | |  | Uncultured *Trichosporon* sp. clone | [Basidiomycota](http://en.wikipedia.org/wiki/Basidiomycota) | 569 | AB180201 | 74 | 99 |
| 0.41 | | S01-05 JX898607 | |  | Uncultured soil fungus clone | EDFL | 424 | JQ666464 | 47 | 92 |
| 0.41 | | S01-15 JX898609 | |  | Uncultured soil fungus clone | EDFL | 137 | EU517006 | 19 | 90 |
| 0.41 | | S01-16 JX898610 | |  | Uncultured soil fungus clone | EDFL | 292 | EF635761 | 32 | 96 |
| 0.41 | | S06-36 JX898614 | |  | Uncultured fungus clone | EDFL | 233 | EF392540 | 18 | 93 |
| 0.41 | | S06-40 JX898596 | |  | Uncultured *Hyaloraphidium* sp. clone | Chytridiomycota | 334 | AY997055 | 68 | 80 |
| 0.41 | | S07-05 JX898597 | |  | Uncultured *Sympodiomyces* sp. clone | Ascomycota | 520 | HQ623607 | 99 | 87 |
| 0.41 | | S01-17 JX898611 | |  | Uncultured [*Mortierella* sp.](http://blast.ncbi.nlm.nih.gov/Blast.cgi#alnHdr_411031012) clone | EDFL | 924 | HQ630349 | 100 | 96 |
| 0.41 | | S01-19 JX898559 | |  | Uncultured *Verrucariales* sp. clone | Ascomycota | 697 | HQ022024 | 75 | 91 |
| 0.41 | | S02-02 JX605057 | |  | Uncultured fungus clone | EDFL | 460 | FM178265 | 100 | 89 |
| 0.41 | | S01-11 JX605055 | |  | Uncultured *Trichosporon* sp. clone | Ascomycota | 767 | FJ943427 | 100 | 98 |
| 0.41 | | S01-13 JX898608 | |  | Uncultured soil fungus clone | EDFL | 169 | EU489943 | 15 | 90 |
| 0.41 | | S02-07 JX898611 | |  | Uncultured fungus clone | Ascomycota | 355 | JX974777 | 56 | 92 |
| 0.41 | | S02-16 JX605066 | |  | Uncultured *Debaryomyces sp.*clone | Ascomycota | 1046 | KC111444 | 100 | 100 |
| 0.41 | | S02-17 JX898565 | |  | Uncultured fungus clone | EDFL | 329 | FM178265 | 86 | 86 |
| 0.41 | | S02-37 JX898572 | |  | Uncultured *Trichosporon* sp. clone | [Basidiomycota](http://en.wikipedia.org/wiki/Basidiomycota) | 608 | HF558657 | 66 | 98 |
| 0.41 | | S02-38 JX898573 | |  | Uncultured [*Mortierella* sp.](http://blast.ncbi.nlm.nih.gov/Blast.cgi#alnHdr_411031012) clone | EDFL | 723 | HQ211948 | 99 | 89 |
| 0.41 | | S04-18 JX898575 | |  | Uncultured *Ganoderma* sp. clone clone | [Basidiomycota](http://en.wikipedia.org/wiki/Basidiomycota) | 654 | JN048773 | 75 | 99 |
| 0.41 | | S04-24 JX605097 | |  | Uncultured soil fungus clone | EDFL | 497 | JQ666392 | 100 | 93 |
| 0.41 | | *S04-26 JX898576 | |  | Uncultured *Penicillium sp.* clone | Ascomycota | 959 | JX270368 | 100 | 99 |
| 0.41 | | S04-34 JX605106 | |  | Uncultured soil fungus clone | EDFL | 545 | JQ666392 | 100 | 96 |
| 0.41 | | S04-40 JX898577 | |  | [Uncultured Glomeromycota clone](http://blast.ncbi.nlm.nih.gov/Blast.cgi#alnHdr_298257779) | Glomeromycota | 420 | GU392007 | 53 | 92 |
| 0.41 | | *S05-02 JX898578 | |  | Uncultured *Trichosporon dulcitum* clone | [Basidiomycota](http://en.wikipedia.org/wiki/Basidiomycota) | 815 | HM136684 | 100 | 99 |
| 0.41 | | *S05-13 JX605117 | |  | Uncultured *Thamnidium elegans* clone | EDFL | 1153 | AB113025 | 100 | 99 |
| 0.41 | | S05-16 JX605120 | |  | Uncultured *Chrysosporium* sp. clone | Ascomycota | 852 | AM949568 | 100 | 94 |
| 0.41 | | S05-18 JX898582 | |  | Uncultured Pseudeurotiaceae sp. clone | Ascomycota | 564 | JX270610 | 62 | 99 |
| 0.41 | | S05-19 JX605122 | |  | Uncultured *Geomyces* sp. clone | Ascomycota | 575 | HQ211533 | 100 | 89 |
| 0.41 | | S05-31 JX898584 | |  | Uncultured *Trichosporon* sp. clone | [Basidiomycota](http://en.wikipedia.org/wiki/Basidiomycota) | 619 | HF558657 | 66 | 99 |
| 0.41 | | S06-09 JX898590 | |  | Uncultured fungus clone | EDFL | 488 | EF635761 | 74 | 84 |
| 0.41 | | S06-11 JX605145 | |  | Uncultured Ascomycota clone | Ascomycota | 648 | HQ211979 | 92 | 96 |
| 0.41 | | S06-12 JX898591 | |  | Uncultured fungus clone | Ascomycota | 808 | EF434057 | 97 | 88 |
| 0.41 | | S06-13 JX605146 | |  | Uncultured fungus clone | EDFL | 484 | AJ920022 | 100 | 89 |
| 0.41 | | *S06-15 JX605148 | |  | Uncultured *Penicillium brevicompactum* | Ascomycota | 924 | HM469408 | 100 | 100 |
| 0.41 | | S06-16 JX898613 | |  | Uncultured soil fungus clone | Chytridiomycota | 257 | EU480336 | 26 | 94 |
| 0.41 | | S11-04 JX898619 | |  | Uncultured fungus clone | EDFL | 113 | JQ313110 | 18 | 84 |
| 0.41 | | S11-06 JX898620 | |  | Uncultured *Leptodiscella sp.clone* | EDFL | 127 | FR821312 | 17 | 83 |
| 0.41 | | S11-08 JX898621 | |  | Uncultured fungus clone | EDFL | 250 | HQ693513 | 25 | 90 |
| 0.41 | | S11-09 JX898622 | |  | Uncultured fungus clone | EDFL | 295 | EU825633 | 24 | 95 |
| 0.41 | | S11-10 JX898604 | |  | Uncultured fungus clone | EDFL | 358 | JQ681169 | 88 | 81 |
| 0.41 | | S11-12 JX898623 | |  | Uncultured fungus clone | EDFL | 134 | DQ421220 | 23 | 77 |
| 0.41 | | S11-16 JX898624 | |  | Uncultured fungus clone | EDFL | 291 | EU517006 | 28 | 97 |
| 0.41 | | S11-20 JX675217 | |  | Uncultured *Exophiala dermatitidis* clone | Ascomycota | 1059 | GU942305 | 100 | 99 |
| 0.41 | | S09-15 JX898616 | |  | Uncultured fungus clone | EDFL | 282 | HQ829352 | 26 | 90 |
| 0.41 | | S09-19 JX898603 | |  | Uncultured fungus clone | EDFL | 302 | HQ829349 | 68 | 87 |
| 0.41 | | S11-01 JX605210 | |  | Uncultured *Lycoperdon pyriforme* clone | Basidiomycota | 1157 | AY854075 | 100 | 99 |
| 0.41 | | S11-02 JX898618 | |  | Uncultured fungus clone | EDFL | 132 | EU718671 | 34 | 86 |
| 0.41 | | S07-23 JX898600 | |  | Uncultured *Mortierella* sp. Finse clone | EDFL | 733 | AJ541798 | 71 | 99 |
| 0.41 | | S09-13 JX898615 | |  | Uncultured soil fungus clone | EDFL | 197 | JQ666448 | 33 | 89 |
| 0.41 | | S06-19 JX605151 | |  | Uncultured tremellomycete clone | Basidiomycota | 994 | EU030394 | 100 | 99 |
| 0.41 | | S06-22 JX898592 | |  | Uncultured fungus clone | EDFL | 652 | EU516682 | 72 | 93 |
| 0.41 | | S09-08 JX605203 | |  | Uncultured fungus clone | Ascomycota | 668 | EU754961 | 100 | 94 |
| 0.83 | | *S11-03 JX605211 | |  | Uncultured *Ganoderma* sp. clone | Basidiomycota | 1000 | AF255097 | 100 | 99 |
| 0.83 | | S01-01 JX605050 | |  | Uncultured soil fungus clone | EDFL | 982 | GU083255 | 100 | 99 |
| 0.83 | | S01-07 JX898554 | |  | Uncultured [*Mortierella* sp.](http://blast.ncbi.nlm.nih.gov/Blast.cgi#alnHdr_411031012) clone | EDFL | 852 | JX270390 | 86 | 98 |
| 0.83 | | S01-14 JX898557 | |  | Uncultured Ascomycota clone | Ascomycota | 285 | HM240007 | 51 | 84 |
| 0.83 | | S02-18 JX605067 | |  | Uncultured [*Mortierella* *hypsicladia*](http://blast.ncbi.nlm.nih.gov/Blast.cgi#alnHdr_411031012) clone | EDFL | 1072 | HQ630302 | 100 | 98 |
| 0.83 | | S05-25 JX605127 | |  | Uncultured *Gymnoascus* sp. clone | Ascomycota | 1011 | JX270524 | 100 | 100 |
| 0.83 | | S07-09 JX605168 | |  | Uncultured *Paecilomyces inflatus* clone | Ascomycota | 868 | GU566291 | 100 | 99 |
| 0.83 | | S06-23 JX605152 | |  | Uncultured *Thamnidium elegans* clone | EDFL | 884 | AB113013 | 100 | 92 |
| 0.83 | | S04-15 JX898612 | |  | Uncultured fungus clone | EDFL | 298 | FJ528704 | 29 | 94 |
| 1.24 | | S02-03 JX898562 | |  | Uncultured  [*Gymnoascus* sp.](http://blast.ncbi.nlm.nih.gov/Blast.cgi#alnHdr_411031012) clone | Ascomycota | 1002 | JX270593 | 100 | 99 |
| 1.24 | | S09-03 JX898601 | |  | Uncultured fungus clone | EDFL | 612 | EF635761 | 89 | 93 |
| 1.24 | | *S06-17 JX605149 | |  | Uncultured *Mortierella cf. gamsii* clone | EDFL | 1023 | HQ630307 | 100 | 100 |
| 1.24 | | S06-33 JX898595 | |  | Uncultured fungus clone | EDFL | 893 | EU516682 | 92 | 92 |
| 1.66 | | *S01-06 JX605052 | |  | Uncultured [*Mortierella* sp.](http://blast.ncbi.nlm.nih.gov/Blast.cgi#alnHdr_411031012) clone | EDFL | 1020 | JX270478 | 100 | 99 |
| 1.66 | | S05-26 JX605128 | |  | Uncultured fungus clone | Chytridiomycota | 488 | EU480016 | 100 | 84 |
| 2.07 | | *S09-09 JX605204 | |  | Uncultured [*Mortierella* sp.](http://blast.ncbi.nlm.nih.gov/Blast.cgi#alnHdr_411031012) clone | EDFL | 989 | GU327518 | 100 | 99 |
| 2.07 | | *S02-21 JX605069 | |  | Uncultured *Helicostylum pulchrum* clone | EDFL | 1099 | JQ319049 | 100 | 99 |
| 2.90 | | *S05-30 JX605132 | |  | Uncultured *Chaetomium* sp. clone | Ascomycota | 881 | GU934510 | 100 | 99 |
| 2.90 | | *S06-14 JX605147 | |  | Uncultured *Geomyces pannorum* clone | Ascomycota | 895 | JF311913 | 100 | 100 |
| 8.29 | | *S02-19 JX898566 | |  | Uncultured [*Mortierella* sp.](http://blast.ncbi.nlm.nih.gov/Blast.cgi#alnHdr_411031012) clone | EDFL | 1077 | JX270382 | 100 | 99 |
| 17.84 | | *S04-33 JX605105 | |  | Uncultured *Trichosporon dulcitum* clone | [Basidiomycota](http://en.wikipedia.org/wiki/Basidiomycota) | 859 | HF558657 | 100 | 100 |
| 26.97 | | *S07-15 JX605174 | |  | Uncultured [*Mortierella* sp.](http://blast.ncbi.nlm.nih.gov/Blast.cgi#alnHdr_411031012) clone | EDFL | 1058 | AJ541798 | 100 | 99 |

aRelative abundance for the combined libraries, which was used to sort the entries

bOTUs were characterized by Mothur platform [1], the OTU is ≥97% similar to a fungal isolate

cBLASTN [2] score value

dAccession number of the closest database match

eCoverage of pairwise alignment of the closest database match

fLevel of similarity for pairwise alignments with the closest match, using the Martinez-Needleman-Wunsch algorithm [2]

*Common OTUs recovered from LSU and ITS clone libraries
